# Supplementary material for: Characterization of Peucedani Radix extract-derived angular-type pyranocoumarins in rats using ultra-high performance liquid chromatography coupled with hybrid triple quadrupole-linear ion trap mass spectrometry
Source: Royal Society of Chemistry journal article supplement (doi:10.1039/c4ay00727a), 2014-01-01
Supplement: c4ay00727a1.pdf [file c4ay00727a1.pdf]

## Supplemental data

### **Characterization of Peucedani Radix extract-derived angular-type pyranocoumarins in rats using ultra high performance liquid chromatography coupled with hybrid triple quadrupole-linear ion trap mass spectrometry**

Yuelin Song <sup>a,b#</sup>, Wanghui Jing <sup>a#</sup>, Pengfei Tu <sup>b,c</sup>, Yi-Tao Wang <sup>a\*</sup>

**Fig. S1** MRM chromatograms of CK, CAK-4, TAK-4, TAK-3, AAK, PA, AIK, ASK, PB, PE and DIK at their respective concentration of lower limits of detection;

**Fig. S2** MIM chromatograms of CK, CAK-4, TAK-4, TAK-3, AAK, PA, AIK, ASK, PB, PE and DIK at their respective concentration of lower limits of detection.

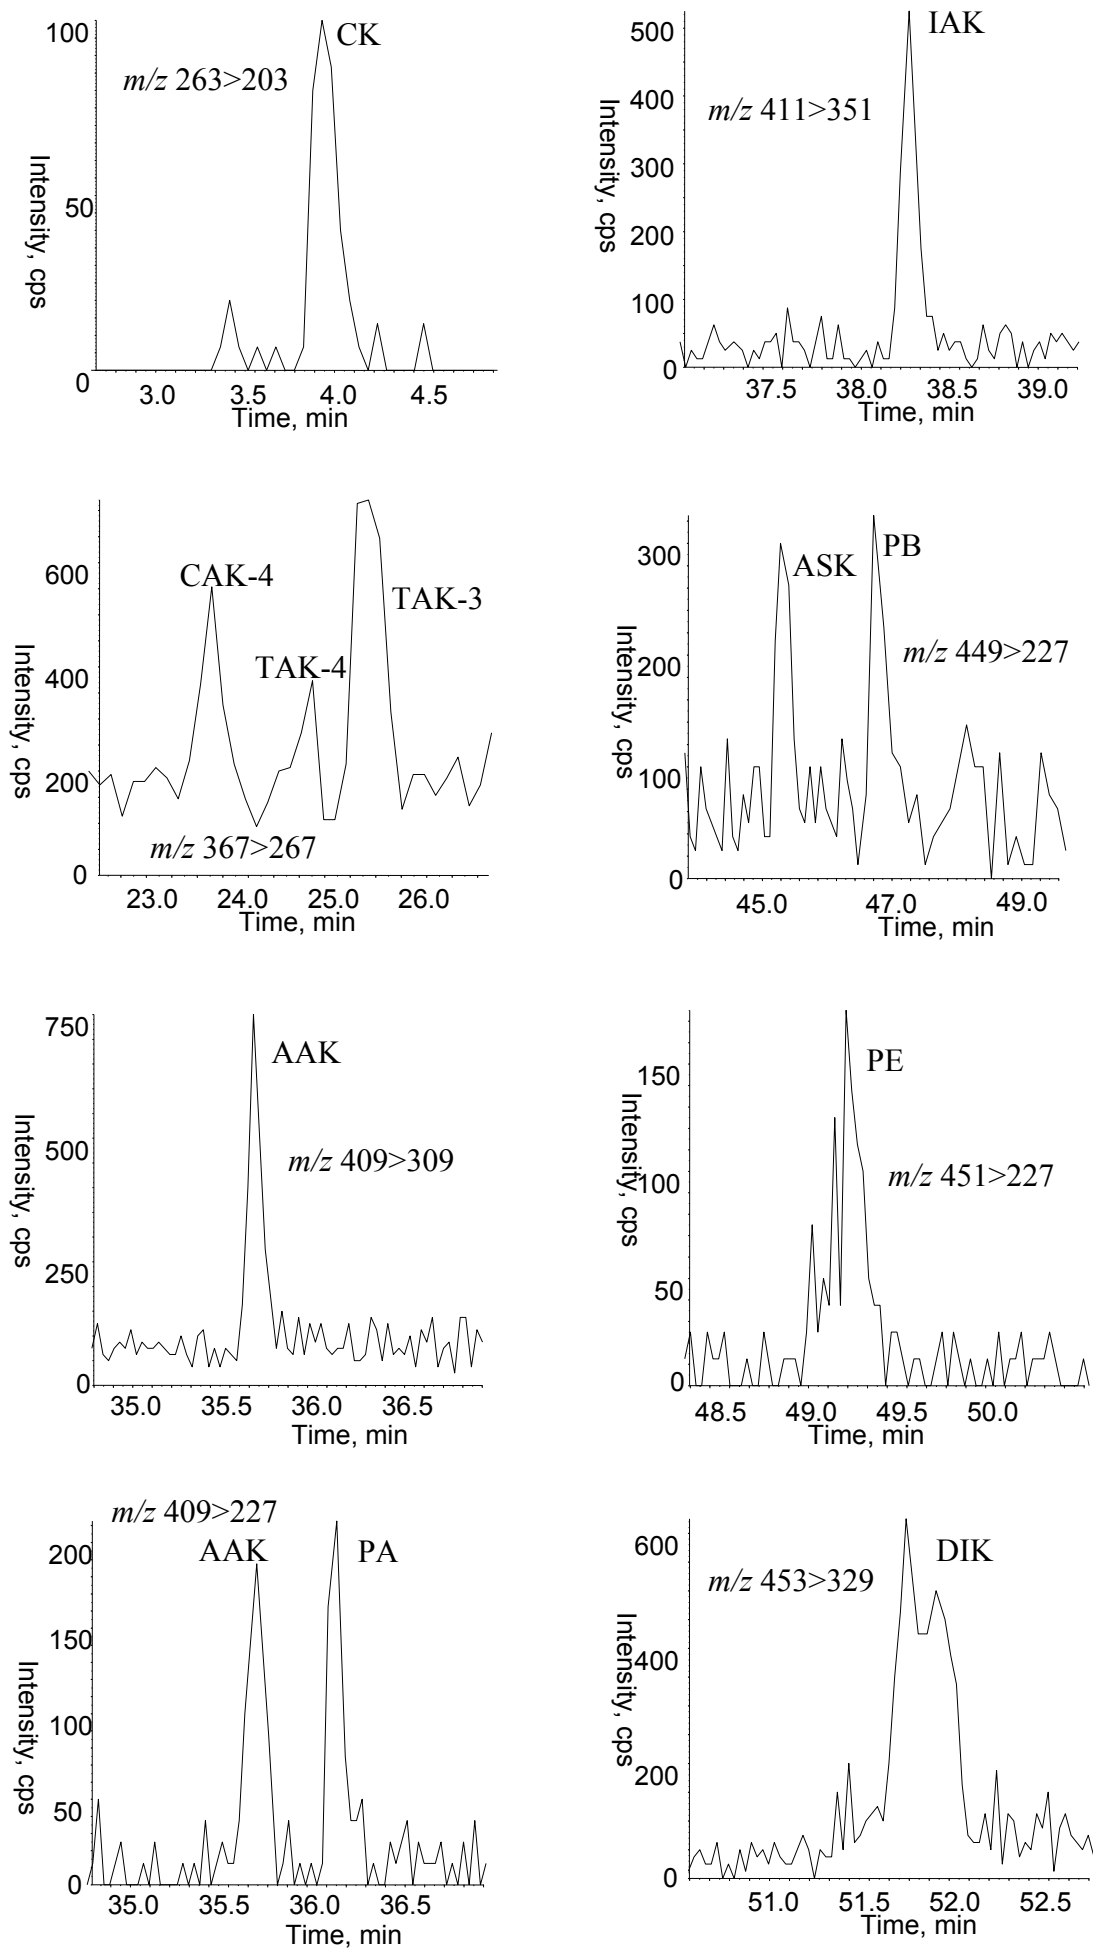

Fig. S1

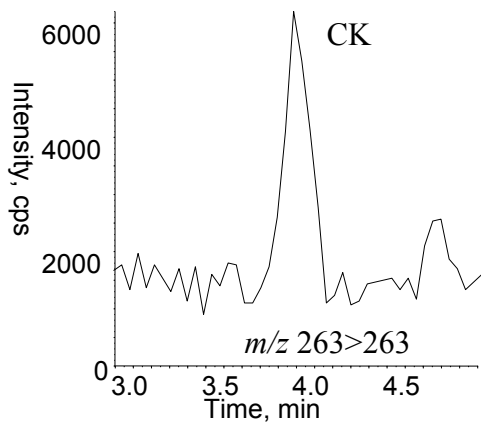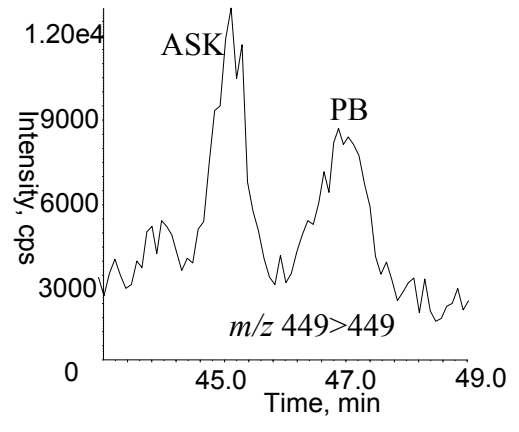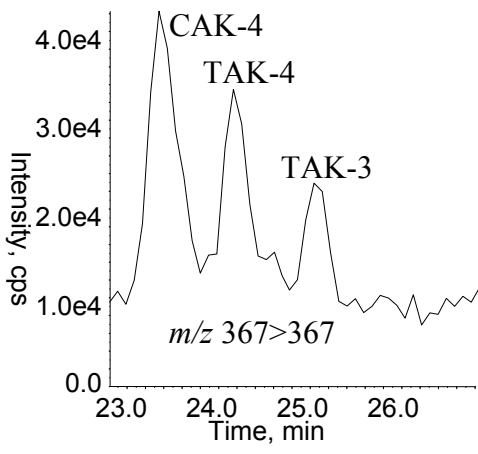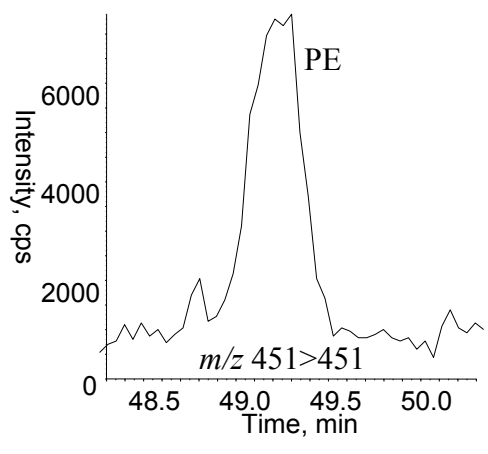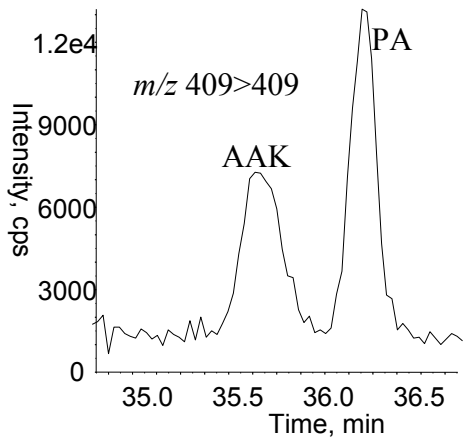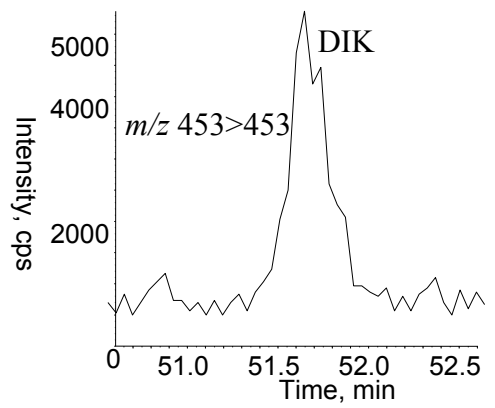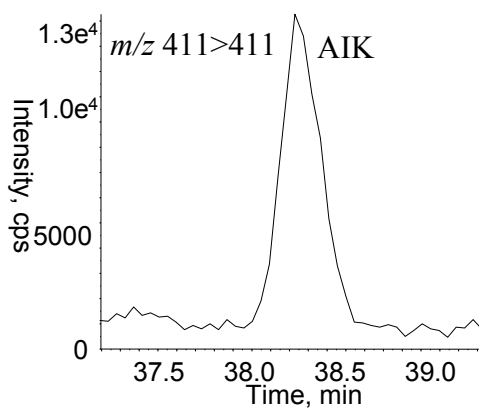

Fig. S2
